# Supplementary material for: A winged helix domain in human MUS81 binds DNA and modulates the endonuclease activity of MUS81 complexes
Source: PubMed Central journal article supplement (PMC3834828; doi:10.1093/nar/gkt760), 2013-08-27
Supplement: supp_gkt760_nar-01948-m-2012-File008.pdf [file supp_gkt760_nar-01948-m-2012-File008.pdf]

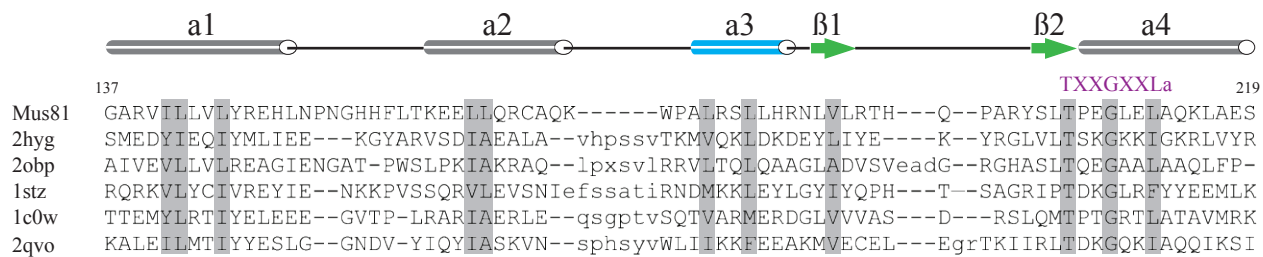

Figure S1

Fadden et al.

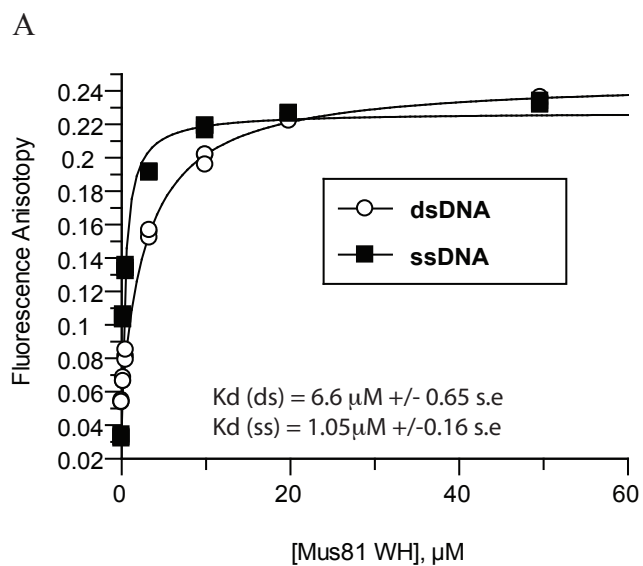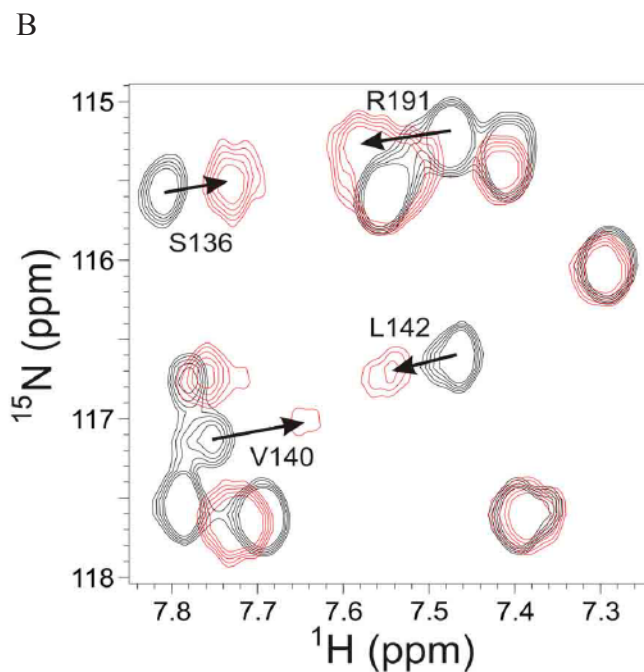

Figure S2

Fadden et al.
